# Supplementary material
Source: PubMed Central journal article supplement (PMC2955499)
Supplement: mmc1.pdf [file mmc1.pdf]

**Biophysical Journal, Volume 99**

**Supporting Material**

**The Binding Interface of Cytochrome *c* and Cytochrome *c*<sub>1</sub> in the *bc*<sub>1</sub> Complex: Rationalizing the Role of Key Residues**

Oleksandr Kokhan, Colin A. Wraight, and Emad Tajkhorshid

# The Binding Interface of Cytochrome *c* and Cytochrome *c*<sub>1</sub> in the *BC*<sub>1</sub> Complex: Rationalizing the Role of Key Residues

Kokhan et al.

## Supplemental Material

**Figure S1.** Cytochrome *c* (mature protein) sequence alignment

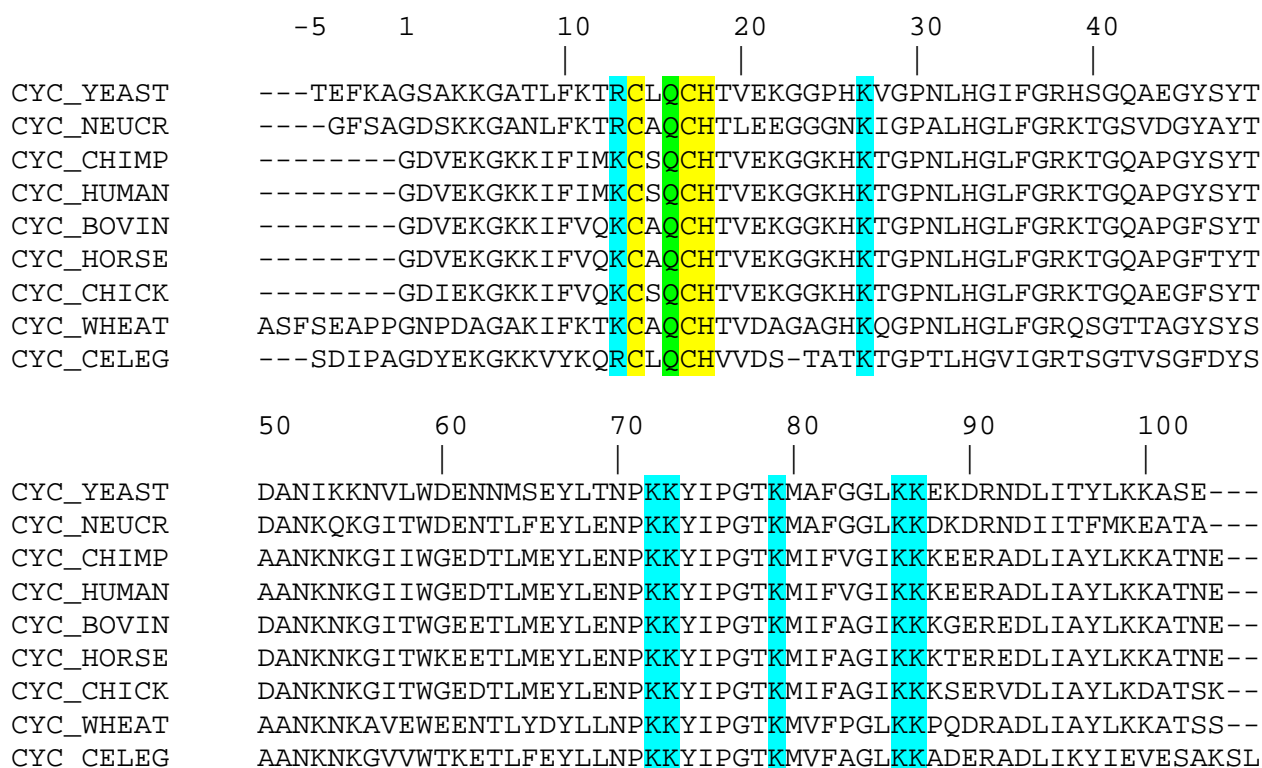

CYC\_YEAST – *Saccharomyces cerevisiae* (Baker's yeast); CYC\_NEUCR – *Neurospora crassa* (bread mould); CYC\_CHIMP – *Pan troglodytes* (chimpanzee); CYC\_HUMAN – *Homo sapiens* (human); CYC\_BOVIN – *Bos taurus* (cow); CYC\_HORSE – *Equus caballus* (horse); CYC\_CHICK – *Gallus gallus* (chicken); CYC\_WHEAT – *Triticum aestivum* (bread wheat); CYC\_CELEG – *Caenorhabditis elegans* (nematode). Highlighted: *c*-heme binding motif (yellow), conserved basic residues of cyt *c* in the *c*-*c*<sub>1</sub> interface (cyan), conserved glutamine (green).

**Table S1.** Summary of MD simulations

| Simulation               | Time, ns | Remarks                                                                                                                                                                          |
|--------------------------|----------|----------------------------------------------------------------------------------------------------------------------------------------------------------------------------------|
| freeA                    | 19.84    | 276,149 atoms; NPT;<br><i>bc</i> <sub>1</sub> dimer with cyt <i>c</i><br>bound                                                                                                   |
| freeB                    | 16.12    |                                                                                                                                                                                  |
| freeC                    | 10.75    |                                                                                                                                                                                  |
| freeD                    | 9.92     |                                                                                                                                                                                  |
| freeE                    | 7.97     |                                                                                                                                                                                  |
| fixA                     | 10.0     | 276,145 atoms; NVT;<br><i>bc</i> <sub>1</sub> dimer with cyt <i>c</i><br>bound; only atoms < 15 Å<br>from cyt <i>c-c</i> <sub>1</sub> free to<br>move; 2Fe2S clusters<br>removed |
| fixB                     | 10.0     |                                                                                                                                                                                  |
| <i>cc</i> <sub>1</sub> A | 88.48    | 40,233 atoms; NPT;<br>cyt <i>c</i> bound to water-<br>soluble domain of cyt <i>c</i> <sub>1</sub>                                                                                |
| <i>cc</i> <sub>1</sub> B | 83.17    |                                                                                                                                                                                  |
| <i>cc</i> <sub>1</sub> C | 93.62    |                                                                                                                                                                                  |

**Table S2.** Contact times (%)<sup>1</sup> in the Cyt *c*-Cyt *c*<sub>1</sub> binding interface involving at least one atom pair between Cyt *c* and Cyt *c*<sub>1</sub>

| Cyt <i>c</i> residue  | fixA             |                 | fixB |     | freeA |    | freeB |      | freeC |    | freeD |    | freeE |    | Mean±SD <sup>2</sup> |       |
|-----------------------|------------------|-----------------|------|-----|-------|----|-------|------|-------|----|-------|----|-------|----|----------------------|-------|
|                       | Noh <sup>3</sup> | EN <sup>4</sup> | Noh  | EN  | Noh   | EN | Noh   | EN   | Noh   | EN | Noh   | EN | Noh   | EN | Noh                  | EN    |
| Thr-12                | 94               | 0               | 64   | 0   | 95    | 0  | 93    | 17   | 88    | 0  | 60    | 0  | 93    | 0  | 85±6                 | 0     |
| Arg-13                | 97               | 1               | 100  | 15  | 79    | 12 | 93    | 1.0  | 97    | 0  | 96    | 9  | 98    | 5  | 91±4                 | 8±2   |
| Gln-16                | 98               | 95              | 97   | 92  | 100   | 89 | 78    | 64.0 | 92    | 59 | 100   | 98 | 100   | 98 | 98±1                 | 88±6  |
| Lys-27                | 31               | 30              | 91   | 56  | 76    | 60 | 64    | 27.0 | 82    | 60 | 83    | 56 | 76    | 43 | 74±8                 | 53±5  |
| Val-28                | 93               | 43              | 99   | 71  | 69    | 27 | 83    | 11.0 | 97    | 48 | 91    | 21 | 88    | 32 | 86±6                 | 38±7  |
| M3Lys-72 <sup>5</sup> | 98               | 95              | 82   | 62  | 96    | 93 | 11    | 10.6 | 88    | 72 | 77    | 23 | 94    | 84 | 90±3                 | 76±11 |
| Lys-79                | 85               | 40              | 83   | 40  | 66    | 56 | 0     | 0.0  | 99    | 63 | 58    | 31 | 99    | 94 | 78±7                 | 53±8  |
| Ala-81                | 97               | 2               | 97   | 1   | 96    | 0  | 5     | 0.0  | 97    | 4  | 98    | 6  | 61    | 0  | 93±5                 | 2±1   |
| Lys-86                | 63               | 61              | 100  | 100 | 84    | 81 | 87    | 80.0 | 99    | 99 | 97    | 97 | 85    | 81 | 88±5                 | 86±6  |
| Lys-87                | 88               | 85              | 93   | 84  | 55    | 54 | 82    | 73.0 | 59    | 58 | 56    | 48 | 98    | 98 | 70±8                 | 67±8  |

<sup>1</sup> Percent contact times are averages for each trajectory, omitting the first 3 ns, during which time *cyt c* reached an equilibrium bound state

<sup>2</sup> The mean omits freeB (*cyt c* never fully bound)

<sup>3</sup> Noh = any heavy (non-hydrogen) atom

<sup>4</sup> EN = pairwise interactions between any electronegative atoms with a potentially favorable polar/electrostatic bond, e.g., omitting O..O with no available proton for H-bonding, and NH..NH

<sup>5</sup> For M3Lys-72, the EN column lists contact between any headgroup methyl and any O atom of *cyt c*<sub>1</sub>

Un-highlighted residues – participants in (apolar) bonds identified in the 1KYO.pdb crystal structure (1)

Yellow highlighted residues – conserved polar residues seen to provide additional, major electrostatic interactions in MD simulations.

**Table S3.** Contact times (%)<sup>1</sup> with at least one atom pair between Cyt *c* and the finger of the non-binding Cyt *c*<sub>1</sub>

| Cyt <i>c</i> <sub>1</sub> atom | Cyt <i>c</i> atom | fixA | fixB | freeA | freeB | freeC | freeD | freeE | Mean <sup>2</sup> | SD   |     |
|--------------------------------|-------------------|------|------|-------|-------|-------|-------|-------|-------------------|------|-----|
| Noh <sup>3</sup>               | Noh               | 77.7 | 87.4 | 83.7  | 11.4  | 76.3  | 67.2  | 92.8  | 80.9              | 3.3  |     |
| EN <sup>4</sup>                | EN                | 64.3 | 73.3 | 44.4  | 8.5   | 70.1  | 55.9  | 91.3  | 61.3              | 6.6  |     |
| Glu-140                        | OE1/2             | EN   | 25   | 27    | 16.8  | 2.2   | 5.4   | 2     | 0.8               | 14.0 | 4.3 |
| Gln-141                        | OE1               | EN   | 27.2 | 28.2  | 15    | 2.3   | 54.6  | 32.1  | 67.4              | 32.1 | 7.8 |
| "                              | NE2               | EN   | 38.1 | 59.3  | 21.1  | 2.9   | 60.5  | 41.6  | 85.7              | 44.0 | 9.2 |
| "                              | O/N <sup>5</sup>  | EN   | 52.2 | 61.3  | 31.9  | 5.7   | 69.5  | 53.9  | 91.3              | 53.4 | 8.3 |

<sup>1</sup> Percent contact times are averages for each trajectory, omitting the first 3 ns, during which time cyt *c* reached an equilibrium bound state

<sup>2</sup> The mean omits freeB (cyt *c* never fully bound)

<sup>3</sup> Noh = any heavy (non-hydrogen) atom

<sup>4</sup> EN = any electronegative atom with potentially favorable polar/electrostatic interaction, e.g., omitting O..O with no available proton for H-bonding, and NH..NH

<sup>5</sup> O/N = OE1 *or* NE2 of Gln-141

Major partners (present in at least 3 trajectories, and 15-60% in at least one) are:

Glu-140:OE1/2 .. Ser-47:OG, Lys-79:NZ

Gln-141:OE1 .. Ser-47:OG, Asp-50:N, Ala-51:N, Gly-77:N, Lys-79:NZ

Gln-141:NE2 .. Ser-47:O/OG, Tyr-48:O, Asp-50:OD1/2

Asn-143 also contributed a small fraction of polar contacts with Asp-50:OD1/2 of cyt *c*

**Figure S2.** Mobility and resolution of yeast iso-1-cytochrome *c* bound to cyt *c*<sub>1</sub> and unbound

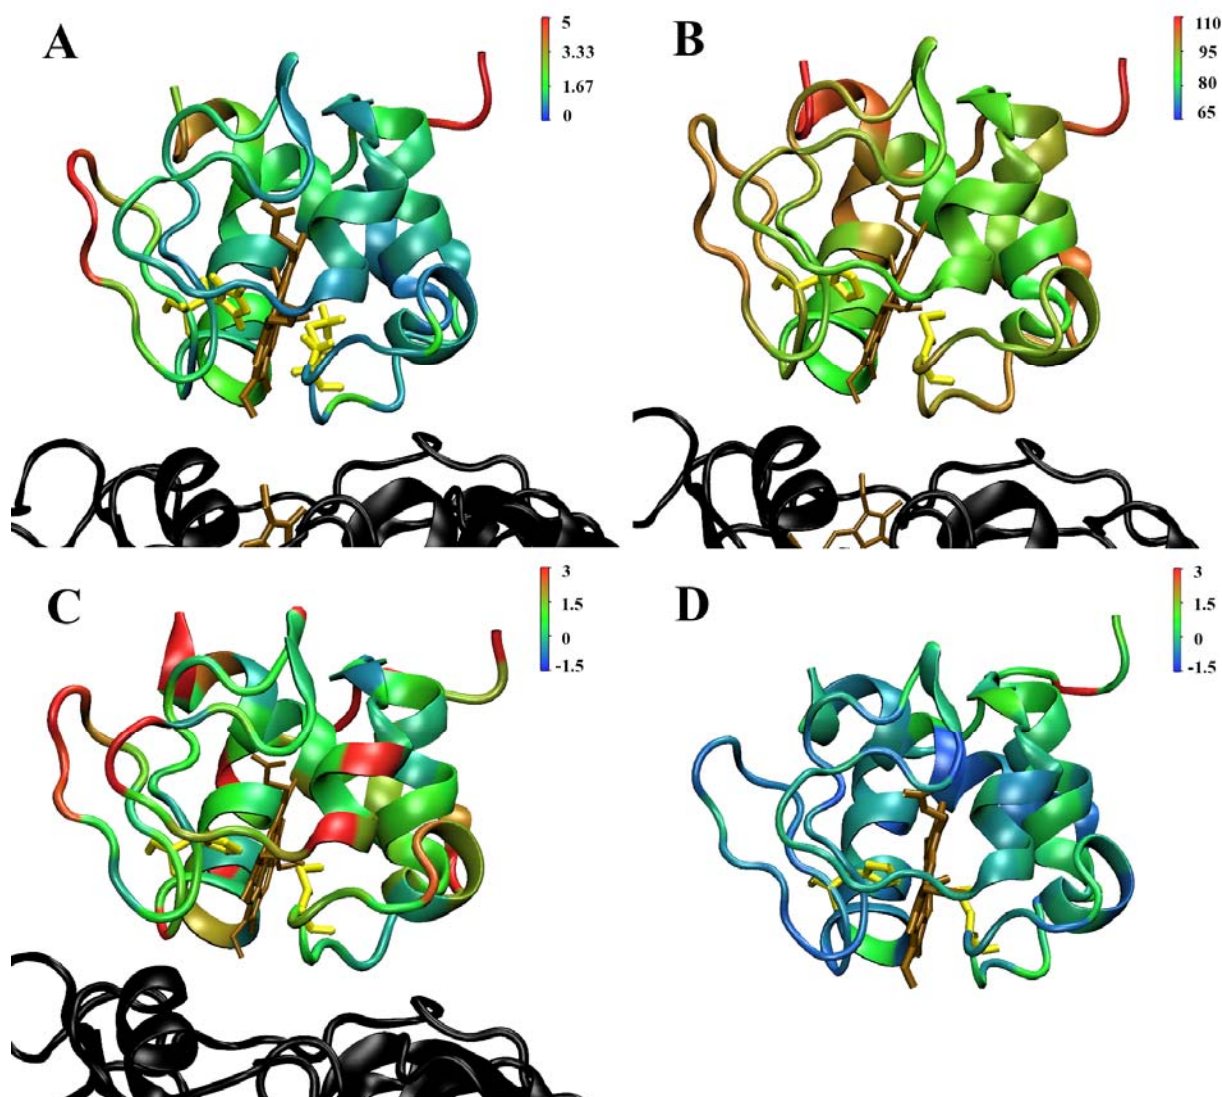

Cyt *c* structures are colored according to: Panel A - average displacement (RMSD, Å) of non-hydrogen atoms of the cyt *c* backbone with respect to the initial structure (1KYO.pdb (1)) observed in trajectory freeA. Panel B - the B-factors of backbone non-hydrogen atoms in 1KYO. Panel C - z-scores for cyt *c* bound to *bc*<sub>1</sub> complex from 3CX5.pdb (2). Panel D - z-scores for unbound cyt *c*, from 1CRH.pdb (3). Cyt *c*<sub>1</sub> is shown in black. Hemes are shown in ochre and heme ligands in yellow. (Note that z-scores are for the whole residue, not just backbone atoms.)

1CRH (rather 1CRG (3)) is shown in panel D for proper comparison with panel C (3CX5), as both have cyt *c* in the reduced form. However, the z-scores for oxidized and reduced cyt *c* when unbound are very similar, and both show the 21-25 loop to be better resolved than average:

1CRH (red) (1.9 Å res): Glu-21 -0.68, Lys-22 -0.56, Gly-23 -0.83, Gly-24 -0.13, Pro-25 -0.48.

1CRG (ox) (2.0 Å res): Glu-21 -0.35, Lys-22 -0.23, Gly-23 -0.15, Gly-24 -0.06, Pro-25 -0.65.

**Table S4.** Electrostatic interactions in the *cyt c*–CCP interface

| Potential electrostatic interactions of <i>cyt c</i> (1 <sup>st</sup> residue) and CCP (2 <sup>nd</sup> residue) |     |                                                        |     |                                                              |     |
|------------------------------------------------------------------------------------------------------------------|-----|--------------------------------------------------------|-----|--------------------------------------------------------------|-----|
| 2GB8 (NMR structure of CCP with yeast <i>cyt c</i> )                                                             |     | 2PCC (X-ray structure of CCP with yeast <i>cyt c</i> ) |     | 2PCB (X-ray structure of CCP with horse heart <i>cyt c</i> ) |     |
| <i>Cyt c</i>                                                                                                     | CCP | <i>Cyt c</i>                                           | CCP | <i>Cyt c</i>                                                 | CCP |
| Lys-11:NZ..Asn-38:OD1                                                                                            |     |                                                        |     | Lys-8:NZ..Asn-38:OD1                                         |     |
| Arg-13:NE..Tyr-39:O                                                                                              |     |                                                        |     |                                                              |     |
| Arg-13:NH2..Asn-196:ND2                                                                                          |     |                                                        |     |                                                              |     |
| Gln-16:NE2..Ala-193:O                                                                                            |     |                                                        |     |                                                              |     |
| Gln-16:NE2..Asn-195:ND2                                                                                          |     |                                                        |     |                                                              |     |
| Asn-70:ND2..Glu-290:OE1                                                                                          |     | Asn-70:ND2..Glu-290:OE1                                |     |                                                              |     |
| Asn-70:ND2..Glu-290:OE2                                                                                          |     |                                                        |     |                                                              |     |
| Lys-73:NZ..Glu-290:OE2                                                                                           |     |                                                        |     | Lys-72:NZ..Glu-290:OE1                                       |     |
| Phe-82:O..Gln-120:O                                                                                              |     |                                                        |     |                                                              |     |
| Lys-86:NZ..Glu-290:OE1                                                                                           |     |                                                        |     |                                                              |     |
| Lys-86:NZ..Glu-290:OE2                                                                                           |     |                                                        |     |                                                              |     |
| Lys-87:NZ..Arg-31:O                                                                                              |     |                                                        |     |                                                              |     |
| Lys-87:NZ..Glu-32:OE2                                                                                            |     |                                                        |     |                                                              |     |
| Lys-87:NZ..Asp-34:OD1                                                                                            |     |                                                        |     |                                                              |     |
| Lys-87:NZ..Asp-34:OD2                                                                                            |     |                                                        |     | Lys-87:NZ..Glu-35:OE2                                        |     |

Pairs of residues in *cyt c* and *cyt c* peroxidase (CCP) potentially forming inter-protein electrostatic interactions (<4Å distance). Left column: data derived from the 2GB8 NMR structure of the yeast *cyt c*–CCP complex in 100 mM Tris, 100 mM NaCl (4). Center column: pairs derived from X-ray structure (2PCC) of the yeast *cyt c*–CCP complex, crystallized under moderate ionic strength conditions (150 mM NaCl, trace potassium phosphate, pH 7.0 (5)). Right column: interacting residue pairs from the 2PCB X-ray structure obtained with horse heart *cyt c* bound to yeast CCP in low salt (5 mM potassium phosphate buffer, pH 7.0 (5)).

**Figure S3.** Lys-86, Lys-87 interaction patterns in Cyt *c*-CCP complex

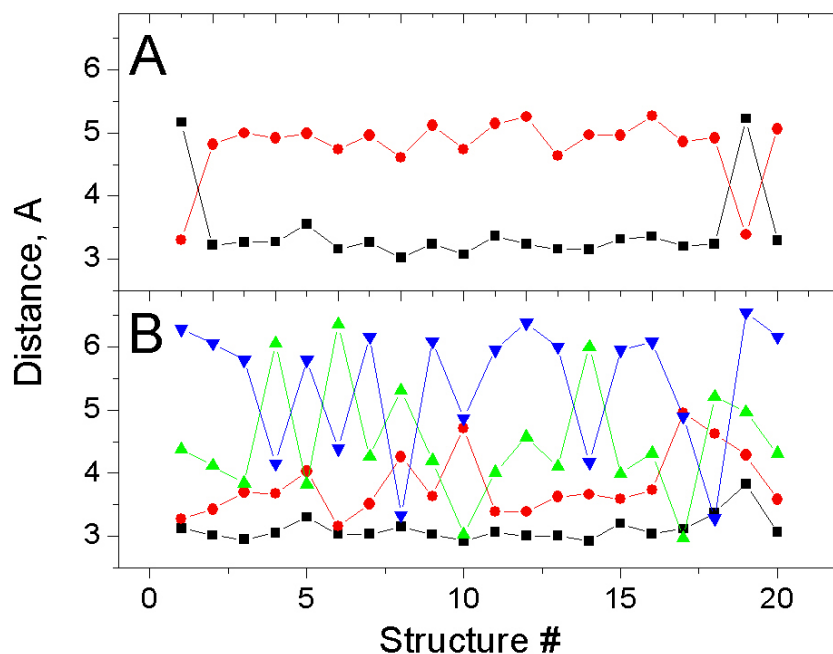

Distance between the NZ atom of Lys-86 (top panel) or Lys-87 (bottom panel) of yeast cyt *c* and potential H-bond acceptors of cyt *c* peroxidase (CCP), based on the 2GB8 NMR structure (4). Top panel: Lys-86 of cyt *c* and Glu-290:OE1 (■) and Glu-290:OE2 (●) of CCP. Bottom panel: Lys-87 of cyt *c* and Arg-31:O (■), Glu-32:OE2 (●), Asp-34:OD1 (▲), and Asp-34:OD2 (▼) of CCP.

## References

1. Lange, C. and C. Hunte. 2002. Crystal structure of the yeast cytochrome *bc*<sub>1</sub> complex with its bound substrate cytochrome *c*. *Proc. Natl. Acad. Sci. USA* 99:2800-2805.
2. Solmaz, S. R. N. and C. Hunte. 2008. Structure of complex III with bound cytochrome *c* in reduced state and definition of a minimal core interface for electron transfer. *J. Biol. Chem.* 283:17542-17549.
3. Berghuis, A. M., J. G. Guillemette, G. McLendon, F. Sherman, M. Smith, and G. D. Brayer. 1994. The role of a conserved internal water molecule and its associated hydrogen bond network in cytochrome *c*. *J. Mol. Biol.* 236:786-799.
4. Volkov, A. N., J. A. R. Worrall, E. Holtzmann, and M. Ubbink. 2006. Solution structure and dynamics of the complex between cytochrome *c* and cytochrome *c* peroxidase determined by paramagnetic NMR. *Proc. Natl. Acad. Sci. USA* 103:18945-18950.
5. Pelletier, H. and J. Kraut. 1992. Crystal structure of a complex between electron transfer partners, cytochrome *c* peroxidase and cytochrome *c*. *Science* 258:1748-1755.
